# Supplementary material for: A powerful novel strategy for the preparation of discrete inorganic carbon-free rings containing alkaline cations
Source: Royal Society of Chemistry journal article supplement (doi:10.1039/b311524k), 2004-01-01
Supplement: b311524k.doc [file b311524k.doc]

Supplementary information

Experimental data:

**1** yield: 43.95 %; m.p.:294-296 °C; elemental analysis (found): 60.43% (63.45), H: 5.77% (6.22); 31P NMR (121 MHz, CDCl2, 25 C, H3PO4 85%, as reference): = 19.1 ppm.

**2** yield: 41.63%; m.p.: 128-129 °C; elemental analysis (found) C: 58.48 % (60.44), H: 6.17% (5.92); 31P NMR (121 MHz, CDCl2, 25 C, H3PO4 85%, as reference): = 37.8 ppm; MS (FAB+): m/z (%): 675 (5) [M+].

**3** yield: 59.85 %; m.p.: 123-124 °C; elemental analysis (found) C: 51.55% (53.05), H: 5.43% (5.20); 31P NMR (121 MHz, CDCl2, 25 C, H3PO4 85%, as reference):= 27.75 ppm, 1*J*(31P- 77Se) 655.82 Hz; MS (FAB+): m/z (%): 769 (5) [M]+.

**4** yield: 94.04 %; m.p.:150-151 °C; elemental analysis (found) C: 53.94% (56.47), H: 6.14% (5.75); 31P NMR (121 MHz, CDCl2, 25 C, H3PO4 85%, as reference): = 12.12 ppm; MS (FAB+): m/z (%): 765(2) [M]+.

**5** yield: 94.29%; m.p.:198-200 °C; elemental analysis (found) C: 54.10% (54.2), H: 5.82% (5.52); 31P NMR (121 MHz, CDCl2, 25 C, H3PO4 85%, as reference):= 38.19 ppm.

**6** yield: 47.14%; m.p.: 240-241 °C; elemental analysis (found) C: 48.60% (48.48), H: 5.07% (4.94); 31P NMR (121 MHz, CDCl2, 25 C, H3PO4 85%, as reference): = 29.23 ppm, 1*J*(31P-77Se) 643.72 Hz; MS (FAB+): m/z (%): 891(2)[M]+.

**7** yield: 85.28%; m.p.: decompose at 220 °C; elemental analysis (found) C: 47.20% (53.13), H: 5.78% (5.41); 31P NMR (121 MHz, CDCl2, 25 C, H3PO4 85%, as reference): = 11.43 ppm; MS (FAB+): m/z (%): 813(3) [M]+.

**8** yield: 89.81 %; m.p.: 200-202 °C; elemental analysis (found) C: 50.91% (51.12), H: 5.62 % (5.20); 31P NMR (121 MHz, CDCl2, 25 C, H3PO4 85%, as reference): = 37.6 ppm; MS (FAB+): m/z (%): 845 (5) [M]+.

**9** yield: 84.6%; m.p.: melts with decomposition 203 °C; elemental analysis (found) C: 46.00% (46.00), H: 4.82% (4.68); 31P NMR (121 MHz, CDCl2, 25  C, H3PO4 85%, as reference): = 28.78 ppm, 1*J*(31P- 77Se) 665.5 Hz; MS (FAB+): m/z (%):939 (1) [M]+.

Crystal data

Crystals of all the compounds were obtained by means of diffusion in CH2Cl2/Hexane.

Data collections were performed at room temperature with a Siemens P4/PC diffractometer by using graphite monochromated Mo-K radiation ( = 0.71073 Å). The structures were solved by direct methods using Siemens SHELXTL PLUS (PC version) and refined by full matrix least-square calculation. All non-hydrogen atoms were refined anisotropically. Hidrogen positions were refined isotropically.

**2,** C34H42LiNO6P2S2, M = 693.69, triclinic, a = 11.473(2), b = 12.017(3), c = 13.736(2) Ǻ,  = 96.49(2), = 90.96(1),  = 103.93(3) , U = 1824.4(6) Ǻ3, T = 273 K, space group P1, Z=2,  (Mo-K) = 0.276 mm-1, 6777 reflections measured, 6426 unique (Rint = 0.0500) which were used in all calculations. Final R values [I>2(I)] R1 = 0.0631, wR2 = 0.1594, R values (all data) R1 = 0.1022, wR2 = 0.1788.

**3,** C34H42LiNO6P2Se2, M = 787.49 , triclinic, a = 11.449(5), b = 12.050(3), c = 13.894(3) Ǻ,  = 97.60(2), = 91.13(3),  = 103.26(3) , U = 1846.9(10) Ǻ3, T = 273 K, space group P1, Z=2,  (Mo-K) = 2.131 mm-1, 6793 reflections measured, 6445 unique (Rint = 0.0564) which were used in all calculations. Final R values [I>2(I)] R1 = 0.0461, wR2 = 0.0976, R values (all data) R1 = 0.0955, wR2 = 0.1111.

**4,** C36H46NO9P2Rb, M = 784.15, orthorhombic, a = 10.114(4), b = 15.598(2), c = 24.412(3) Ǻ, U = 3851.2(17) Ǻ3, T = 273 K, space group P212121, Z = 4,  (Mo-K) = 1.420 mm-1, 7620 reflections measured, 6777 unique (Rint = 0.0736) which were used in all calculations. Final R values [I>2(I)] R1 = 0.0844, wR2 = 0.1658, R values (all data) R1 = 0.2032, wR2 = 0.2338.

**5,** C36H44NO6P2RbS2, M = 798.25, orthorhombic, a = 23.534(2), b = 72.099(5), c = 9.043(2) Ǻ, U = 15 344(4) Ǻ3, T = 273 K, space group Fdd2, Z= 16,  (Mo-K) = 1.527 mm-1, 6424 reflections measured, 5994 unique (Rint = 0.0635) which were used in all calculations. Final R values [I>2(I)] R1 = 0.0732, wR2 = 0.1184, R values (all data) R1 = 0.1617, wR2 = 0.1517.

**6,** C36H44NO6P2RbSe2, M = 892.05, orthorhombic, a = 23.618(3), b = 72.846(8), c = 9.100(3) Ǻ, U = 15 656(6) Ǻ3, T = 273 K, space group Fdd2, Z= 16,  (Mo-K) = 3.249 mm-1, 7367 reflections measured, 6891 unique (Rint = 0.0552) which were used in all calculations. Final R values [I>2(I)] R1 = 0.0716, wR2 = 0.1271, R values (all data) R1 = 0.1542, wR2 = 0.1633.

**7,** C36H46CsNO9P2, M = 831.59, orthorhombic, a = 10.059(1), b = 15.769(3), c = 24.871(3) Ǻ, U = 3945.0(10) Ǻ3, T = 273 K, space group P212121, Z= 4,  (Mo-K) = 1.070 mm-1, 7784 reflections measured, 6930 unique (Rint = 0.0533) which were used in all calculations. Final R values [I>2(I)] R1 = 0.0586, wR2 = 0.1424, R values (all data) R1 = 0.0920, wR2 = 0.1797.

**8,** C36H44CsNO6P2S2, M = 845.69, monoclinic, a = 9.136(3), b = 20.316(3), c = 21.355(2) Ǻ,  = 94.37(2), U = 3952.1(15) Ǻ3, T = 273 K, space group P21/c, Z= 4,  (Mo-K) = 1.166 mm-1, 7426 reflections measured, 6961 unique (Rint = 0.0344) which were used in all calculations. Final R values [I>2(I)] R1 = 0.0738, wR2 = 0.1727, R values (all data) R1 = 0.1596, wR2 = 0.2268.

**9**, C36H44CsNO6P2Se2, M = 939.49, monoclinic, a = 9.232(2), b = 20.359(3), c = 21.385(2) Ǻ,  = 94.80(1), U = 4005.3(12) Ǻ3, T = 273 K, space group P21/c, Z= 4,  (Mo-K) = 2.864 mm-1, 7512 reflections measured, 7044 unique (Rint = 0.0499) which were used in all calculations. Final R values [I>2(I)] R1 = 0.0808, wR2 = 0.1548, R values (all data) R1 = 0.1952, wR2 = 0.2045.
